1 **Title:** Repetitive mild traumatic brain injury causes synergistic effects on mortality

2

3 **Authors:** Ashley M Willes\*, Tori R Krcmarik\*, Alexander E Daughtry\*, Douglas J Brusich

4 \* = authors contributed equally to this work

5

6 **Author Affiliations and Address:**

7 Human Biology, College of Science, Engineering, and Technology, University of Wisconsin –  
8 Green Bay, Green Bay, WI, USA

9

10 **Corresponding Author:** Dr. Douglas J Brusich, [brusichd@uwgb.edu](mailto:brusichd@uwgb.edu)

11

12 **Author Contributions:**

13 **Ashley M Willes:** Investigation, Formal Analysis, Validation, Writing – Review and Editing

14 **Tori R Krcmarik:** Investigation, Formal Analysis, Validation, Writing – Review and Editing

15 **Alexander Daughtry:** Investigation, Formal Analysis, Validation, Writing – Review and Editing

16 **Douglas J Brusich:** Conceptualization, Data Curation, Formal Analysis, Funding Acquisition,  
17 Investigation, Methodology, Project Administration, Resources, Supervision, Validation,  
18 Visualization, Writing – Original Draft, Writing – Review and Editing

19

20 **Funding:**

21 UWGB Start-Up Funds

22 UWGB Research Scholar

23 **Abstract:**

24 Repetitive mild TBI (rmTBI) events are common in the U.S. However, rmTBI is challenging to  
25 study and this contributes to a poor understanding of mechanistic bases for disease following  
26 these injuries. We used fruit flies (*D. melanogaster*) and a modified version of the high-impact  
27 trauma (HIT) method of TBI to assess the pattern of mortality observed after rmTBI. We found  
28 that the pattern of mortality was synergistic after a critical number of injuries, similar to that  
29 observed previously at more moderate levels of TBI severity. The identity of cellular and  
30 molecular factors which contribute to the synergistic effect on mortality remain unknown, but this  
31 model offers a platform for investigation into such factors.

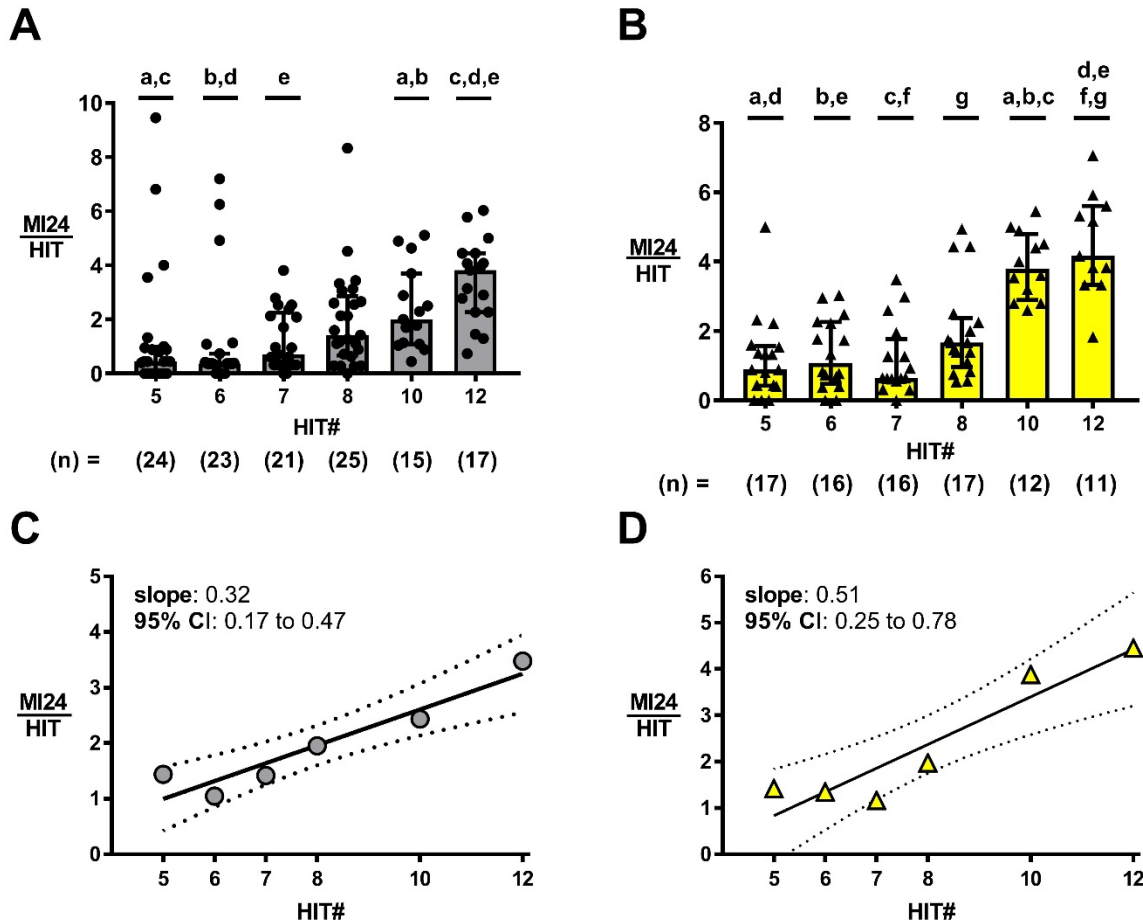

32

33 **Figure 1:** rmtBI causes a synergistic effect on mortality. **(A,B)** Mortality per injury is greater for  
 34 both  $w^{1118}$  (A) and  $y^1w^1$  (B) flies subjected to 10 or 12 HITs vs lesser injury numbers. Data  
 35 plotted are median with IQR. Indicated 'n' values and symbols reflect each vial of  $\geq 40$  flies.  
 36 Datasets with shared letters are statistically different from each other ( $p < 0.05$  by Kruskal-Wallis  
 37 with Dunn's Correction). **(C,D)** Overall MI24/HIT values across 5-12 HITs for both  $w^{1118}$  (C) and  
 38  $y^1w^1$  (D) flies best fit a positive slope line. Symbols are the overall MI24/HIT for the respective  
 39 condition. Solid lines indicate the best-fit line with 95% confidence bands plotted by dashed  
 40 lines.  $n \geq 710$  flies per condition for  $w^{1118}$ ;  $n \geq 537$  flies per condition for  $y^1w^1$ .

41 **Description:**

42 Millions of Americans suffer traumatic brain injury (TBI) each year (Taylor et al. 2017). The vast  
43 majority (~90%) of TBI events in the U.S. are mild traumatic brain injuries, which includes  
44 concussions (Cassidy et al. 2004). Mild TBI commonly causes temporary symptoms, but  
45 repetitive mild TBI (rmTBI) is associated with long-term consequences which may take years to  
46 manifest (Bailes et al. 2013). Current animal models of rmTBI have drawbacks which contribute  
47 to the scarcity of evidence for mechanistic bases of dysfunction and disease.

48 We previously reported an extended fly (*D. melanogaster*) model of TBI based on the high-  
49 impact trauma (HIT) method (Katzenberger et al. 2013; Putnam et al. 2019). We showed that  
50 repetitive injuries at the relatively moderate deflections of 70° and 80°, but not severe injuries at  
51 90° nor mild injuries at 60°, resulted in a synergistic effect on mortality (Putnam et al. 2019).  
52 One potentially confounding issue preventing identification of synergistic effects at 60° was the  
53 low mortality rate after the 1-4 injuries administered (Putnam et al. 2019). We chose to further  
54 investigate the relationship between mortality and rmTBI using the 60° deflection by extending  
55 the injury number to 5-12 HITs.

56 The main outcome measured using the HIT model of TBI in flies is the mortality index at 24  
57 hours (MI24) (Katzenberger et al. 2013). The pattern of mortality across varied HIT numbers  
58 can be assessed by dividing each MI24 value by its respective HIT number (MI24/HIT)  
59 (Katzenberger et al. 2013; Putnam et al. 2019). If mortality from each HIT is additive then the  
60 MI24/HIT values should be equivalent, but, if mortality is synergistic, then the MI24/HIT values  
61 should become increasingly large with HIT number and differ. Neither,  $w^{1118}$  nor  $y^1w^1$  flies  
62 showed any differences in MI24/HIT values across 5-8 HITs (Fig. 1A, 1B respectively).  
63 However, by 10 HITs both genotypes showed larger MI24/HIT values than for 5 or 6 HITs, and  
64 we found a more pronounced effect at 12 HITs (Fig. 1A, 1B). To more fully assess the pattern of  
65 mortality across injury number we checked the MI24/HIT data using a line fit. When we used  
66 data across only 5-8 HITs neither  $w^{1118}$  nor  $y^1w^1$  flies deviated from fit to a zero-slope line ( $w^{1118}$ :  
67  $p = 0.34$ ;  $y^1w^1$ :  $p = 0.45$ ), consistent with additive effects as seen previously. However, inclusion  
68 of data from 5-12 HITs for each of  $w^{1118}$  and  $y^1w^1$  resulted in positive slope lines that significantly  
69 deviated from zero-slope lines (Fig. 1C, 1D respectively;  $w^{1118}$ :  $p = 0.004$ ;  $y^1w^1$ :  $p = 0.006$ ),  
70 consistent with a synergistic relationship.

71 Our data shows that mild TBI causes synergistic effects on mortality after a requisite number of  
72 injuries, possibly because cumulative cellular stress surpasses a critical threshold. We expect  
73 that many of the secondary injury pathways active in animals following our mild TBI (60°)  
74 methodology overlap with pathways previously reported (Katzenberger et al. 2015;  
75 Katzenberger et al. 2016; Anderson et al. 2018; Saikumar et al. 2020; Swanson, Rimkus, et al.  
76 2020; Swanson, Trujillo, et al. 2020). However, the identity of any specific factor(s) which set or  
77 scale the sensitivity to rmTBI remain unknown. Identification of such factor(s) may allow us to  
78 develop diagnostic tools more sensitive to tracking rmTBI outcomes and lead to identification of  
79 genetic risk factors which contribute to disease following rmTBI.

80 **Methods:**

81 **Fly Husbandry and TBI Methodology**

82 Stocks of  $w^{1118}$  (BL 5905) and  $y^1w^1$  (BL 1495) were obtained from the Bloomington Drosophila  
83 Stock Center (Bloomington, Indiana, USA). Flies were maintained in a humidified 25°C  
84 incubator, on a 12H:12H light:dark cycle, and on a standard glucose-cornmeal-yeast food  
85 (Putnam et al. 2019).

86 Methods for TBI were based on those reported previously (Katzenberger et al. 2013; Putnam et  
87 al. 2019). Briefly, flies were collected using CO<sub>2</sub> anesthesia (35 – 60 flies per vial), and  
88 subjected to TBI by 5 days after eclosion. TBI was administered using a modified high-impact  
89 trauma (HIT) device with a stopping point which limited the spring deflection to 60°. The vial was  
90 released and allowed to collide with a foam pad covered by a 1/16" rubber pad. Injuries were  
91 spaced 15 seconds apart and repeated until a total of 5-12 injuries were administered. Animals  
92 were hand-transferred to food vials and returned to the 25°C incubator until they were assessed  
93 for mortality 24 hours later. The mortality index at 24 hours (MI<sub>24</sub>) was calculated as: MI<sub>24</sub> =  
94 number of flies dead at 24 hours/total number of flies \* 100. MI<sub>24</sub>/HIT values were calculated by  
95 dividing the MI<sub>24</sub> value by the administered HIT number.

96 **Statistics**

97 MI<sub>24</sub>/HIT values for comparisons of mean ranks across 5-12 HITs were calculated for each vial  
98 of at least 40 flies. Conditions were compared by Kruskal-Wallis with multiple comparisons of  
99 mean ranks and Dunn's correction at the level of  $\alpha = 0.05$  (GraphPad Prism 7).

100 The pattern of mortality was tested via line-fit of MI<sub>24</sub>/HIT data across HIT number. A single  
101 MI<sub>24</sub> value obtained from full dead:total count data was divided by the HIT number to calculate  
102 the MI<sub>24</sub>/HIT value for each condition. MI<sub>24</sub>/HIT data points were then plotted across HIT  
103 number using the linear fit mode in the nonlinear regression analysis toolkit, fitted using the  
104 least squares fit mode, compared to a hypothetical slope of zero via the extra sum-of-squares F  
105 test at a level of  $\alpha = 0.05$ , and plotted with the best-fit slope and the asymmetrically determined  
106 95% confidence interval (CI) (GraphPad Prism 7).

107 **References**

- 108 Anderson EN, Gochenaur L, Singh A, Grant R, Patel K, Watkins S, Wu JY, Pandey UB. 2018.  
109 Traumatic injury induces stress granule formation and enhances motor dysfunctions in ALS/FTD  
110 models. *Hum Mol Genet.* 27(8):1366–1381. doi:10.1093/hmg/ddy047.
- 111 Bailes JE, Petraglia AL, Omalu BI, Nauman E, Talavage T. 2013. Role of subconcussion in  
112 repetitive mild traumatic brain injury. *J Neurosurg.* 119(5):1235–1245.  
113 doi:10.3171/2013.7.JNS121822.
- 114 Cassidy JD, Carroll LJ, Peloso PM, Borg J, von Holst H, Holm L, Kraus J, Coronado VG, WHO  
115 Collaborating Centre Task Force on Mild Traumatic Brain Injury. 2004. Incidence, risk factors  
116 and prevention of mild traumatic brain injury: results of the WHO Collaborating Centre Task  
117 Force on Mild Traumatic Brain Injury. *J Rehabil Med.*(43 Suppl):28–60.  
118 doi:10.1080/16501960410023732.
- 119 Katzenberger RJ, Chtarbanova S, Rimkus SA, Fischer JA, Kaur G, Seppala JM, Swanson LC,  
120 Zajac JE, Ganetzky B, Wassarman DA. 2015. Death following traumatic brain injury in  
121 *Drosophila* is associated with intestinal barrier dysfunction. *Elife.* 4. doi:10.7554/eLife.04790.
- 122 Katzenberger RJ, Ganetzky B, Wassarman DA. 2016. Age and Diet Affect Genetically  
123 Separable Secondary Injuries that Cause Acute Mortality Following Traumatic Brain Injury in  
124 *Drosophila*. *G3.* 6(12):4151–4166. doi:10.1534/g3.116.036194.
- 125 Katzenberger RJ, Loewen CA, Wassarman DR, Petersen AJ, Ganetzky B, Wassarman DA.  
126 2013. A *Drosophila* model of closed head traumatic brain injury. *Proc Natl Acad Sci U S A.*  
127 110(44):E4152-9. doi:10.1073/pnas.1316895110.
- 128 Putnam L, Disher N, Kalata B, Willes A, Brusich DJ. 2019. Expansion of a traumatic brain injury  
129 model: Standardization of four levels of injury severity. *Fly (Austin).*  
130 doi:10.1080/19336934.2019.1664363.
- 131 Saikumar J, Byrns CN, Hemphill M, Meaney DF, Bonini NM. 2020. Dynamic neural and glial  
132 responses of a head-specific model for traumatic brain injury in *Drosophila*. *Proc Natl Acad Sci*  
133 *U S A.* 117(29):17269–17277. doi:10.1073/pnas.2003909117.
- 134 Swanson LC, Rimkus SA, Ganetzky B, Wassarman DA. 2020. Loss of the antimicrobial peptide  
135 metchnikowin protects against traumatic brain injury outcomes in *Drosophila melanogaster*. *G3*  
136 *Genes, Genomes, Genet.* 10(9):3109–3119. doi:10.1534/g3.120.401377.
- 137 Swanson LC, Trujillo EA, Thiede GH, Katzenberger RJ, Shishkova E, Coon JJ, Ganetzky B,  
138 Wassarman DA. 2020. Survival Following Traumatic Brain Injury in *Drosophila* Is Increased by  
139 Heterozygosity for a Mutation of the NF- $\kappa$ B Innate Immune Response Transcription Factor  
140 Relish. *Genetics.* 216(4):genetics.303776.2020. doi:10.1534/genetics.120.303776.
- 141 Taylor CA, Bell JM, Breiding MJ, Xu L. 2017. Traumatic Brain Injury–Related Emergency  
142 Department Visits, Hospitalizations, and Deaths — United States, 2007 and 2013. *MMWR*  
143 *Surveill Summ.* 66(SS-9):1–16. doi:http://dx.doi.org/10.15585/mmwr.ss6609a1.
